# Supplementary material
Source: Springer Nature journal article supplement (https://www.springermedizin.de/resource/supplementary/12879_2007_657_MOESM7_ESM.pdf/9449440)

**Total HIV + or AIDS at 2 years (104 weeks)**

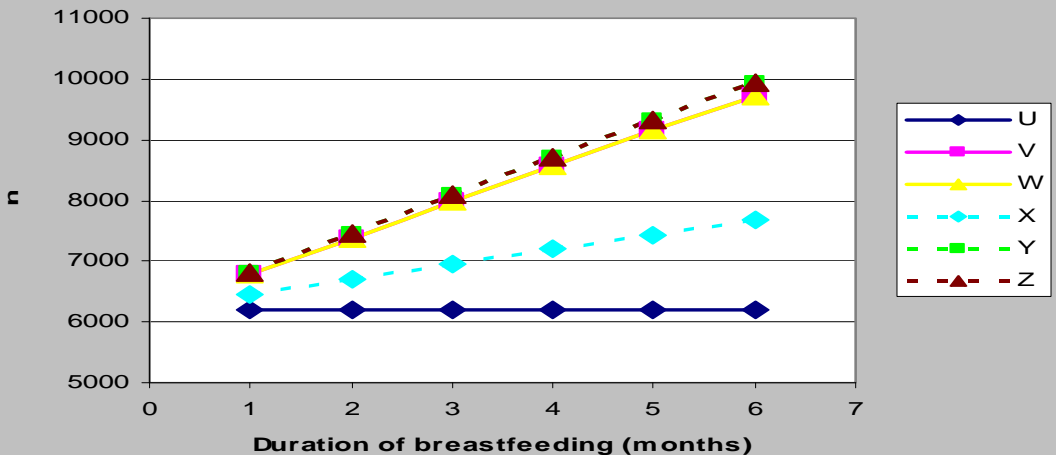

**Dead at 2 years (104 weeks)**

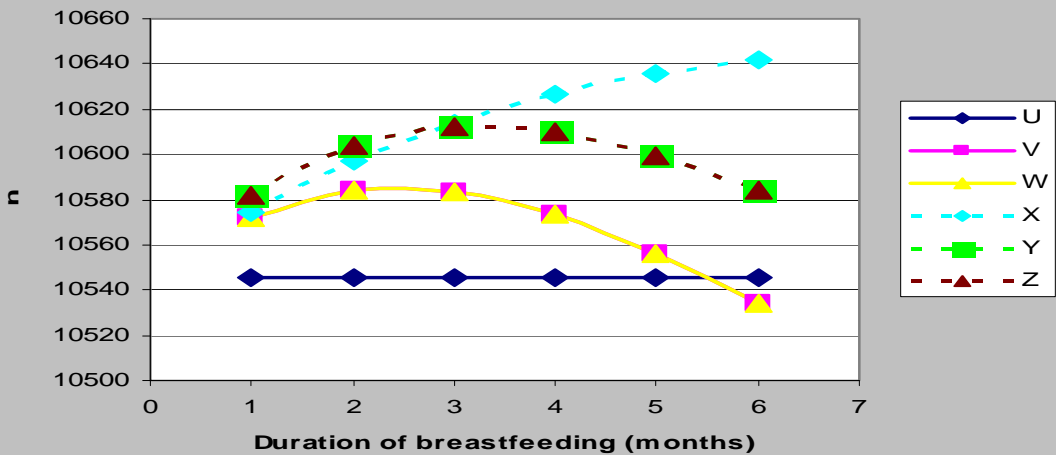

**Total HIV + , AIDS, or dead at 2 years (104 weeks)**

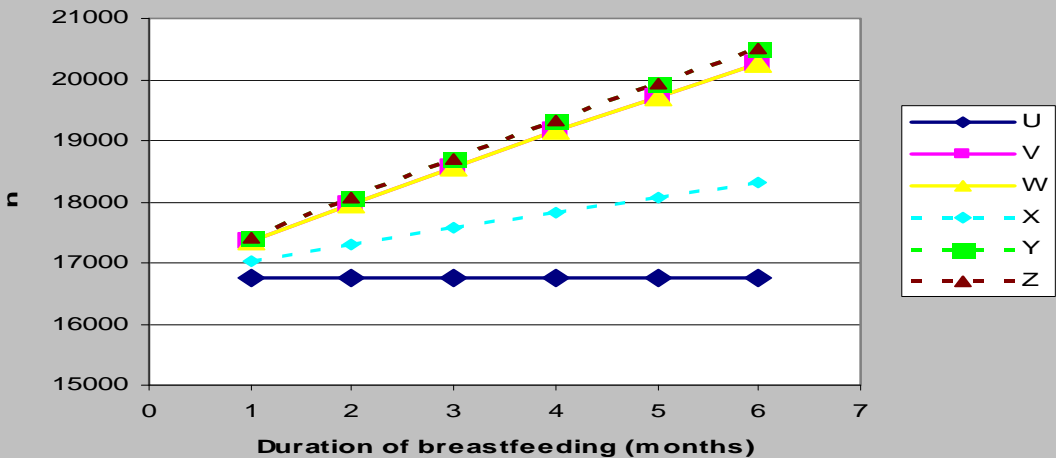

Supplement: MOESM7 [file 9449440]
